# Supplementary material for: Folfirinox versus gemcitabine/nab-paclitaxel as first-line therapy in patients with metastatic pancreatic cancer: a comparative propensity score study
Source: PubMed Central journal article supplement — Ther Adv Gastroenterol. 2019 Sep 25;12:1756284819878660. doi: 10.1177/1756284819878660 (PMC6764033; doi:10.1177/1756284819878660), 2019-09-25
Supplement: SupplTab1.pdf [file SupplTab1.pdf]

| <b>Author, year of publication,<br/>reference</b> | <b>Number of patients<br/>in metastatic setting</b> | <b>Study design</b>           | <b>Study period</b> |
|---------------------------------------------------|-----------------------------------------------------|-------------------------------|---------------------|
| Wang Y, 2017 (5)                                  | FF: 55<br>GN: 66<br>G: 33                           | Retrospective                 | 2014-2016           |
| Kang J, 2018 (6)                                  | FF: 159<br>GN: 149                                  | Retrospective                 | 2013-2016           |
| Kim S, 2018 (8)                                   | FF: 317<br>GN: 337                                  | Retrospective<br>Multicentric | 2015                |
| Cartwright TH, 2018                               | FF: 159<br>GN: 255<br>G: 72                         | Retrospective                 | 2013-2015           |

**Supplementary Table 1**

| <b>Progression-free survival (PFS)</b> | <b>Overall survival (OS)</b> | <b>Conclusion about Superiority of FF or GN in metastatic setting</b> |
|----------------------------------------|------------------------------|-----------------------------------------------------------------------|
| 6.6 months                             | 9.4 months                   | N/A                                                                   |
| 8.3 months                             | 10.0 months                  |                                                                       |
| 3.1 months                             | 3.6 months                   |                                                                       |
| FF: 5.1 months                         | 9.6 months                   | GN for OS (p=0.002)                                                   |
| GN: 6.8 months (NS)                    | 11.4 months                  |                                                                       |
| N/A                                    | 13.8 months                  | No superiority                                                        |
| N/A                                    | 12.1 months                  |                                                                       |
|                                        | (p=0.96)                     |                                                                       |
| TTP: 4.3 months                        | 11.4 months                  | No superiority                                                        |
| TTP: 3.7 months                        | 9.8 months                   |                                                                       |
| (p=0.25)                               | (p=0.38)                     |                                                                       |
