# Supplementary figures and images for: Folfirinox versus gemcitabine/nab-paclitaxel as first-line therapy in patients with metastatic pancreatic cancer: a comparative propensity score study
Source: PubMed Central journal article supplement — Ther Adv Gastroenterol. 2019 Sep 25;12:1756284819878660. doi: 10.1177/1756284819878660 (PMC6764033; doi:10.1177/1756284819878660), 2019-09-25

**A**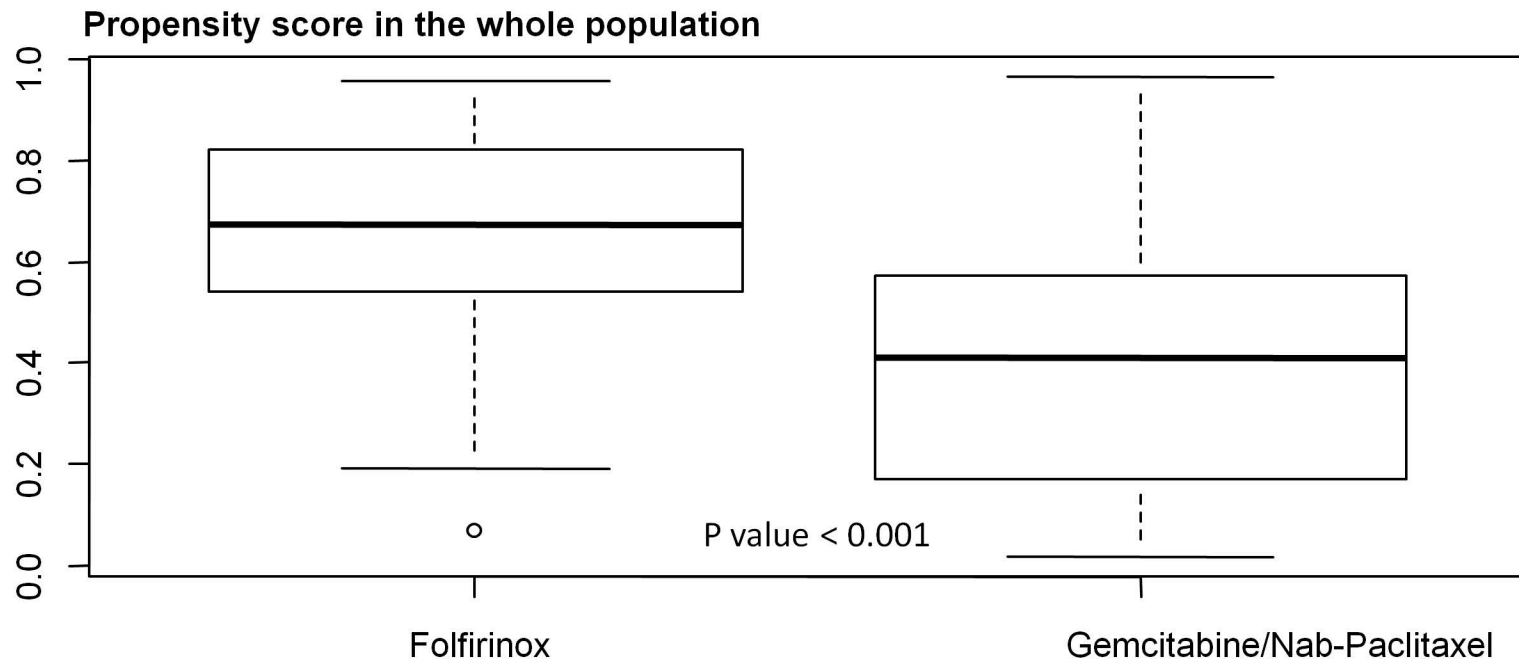**B**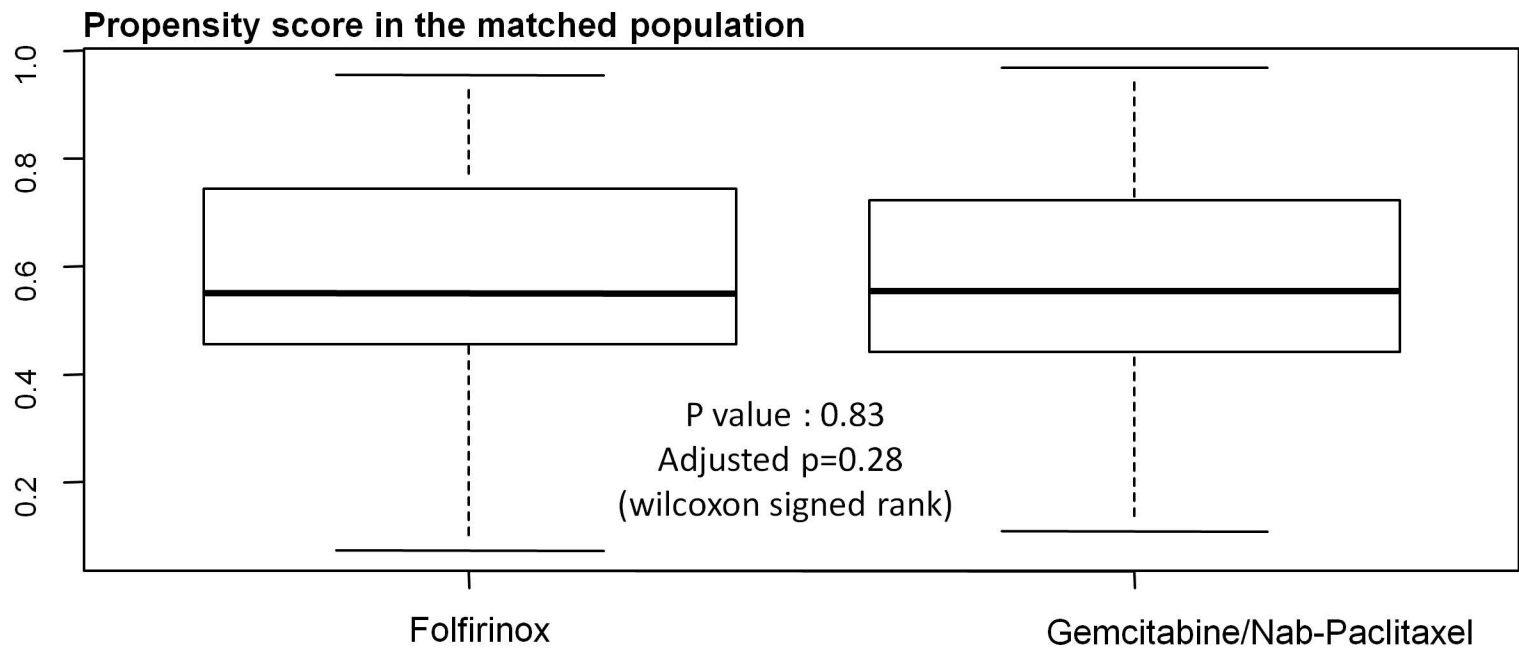

Supplement: SupplFig1PS.pdf [file SupplFig1PS.pdf]

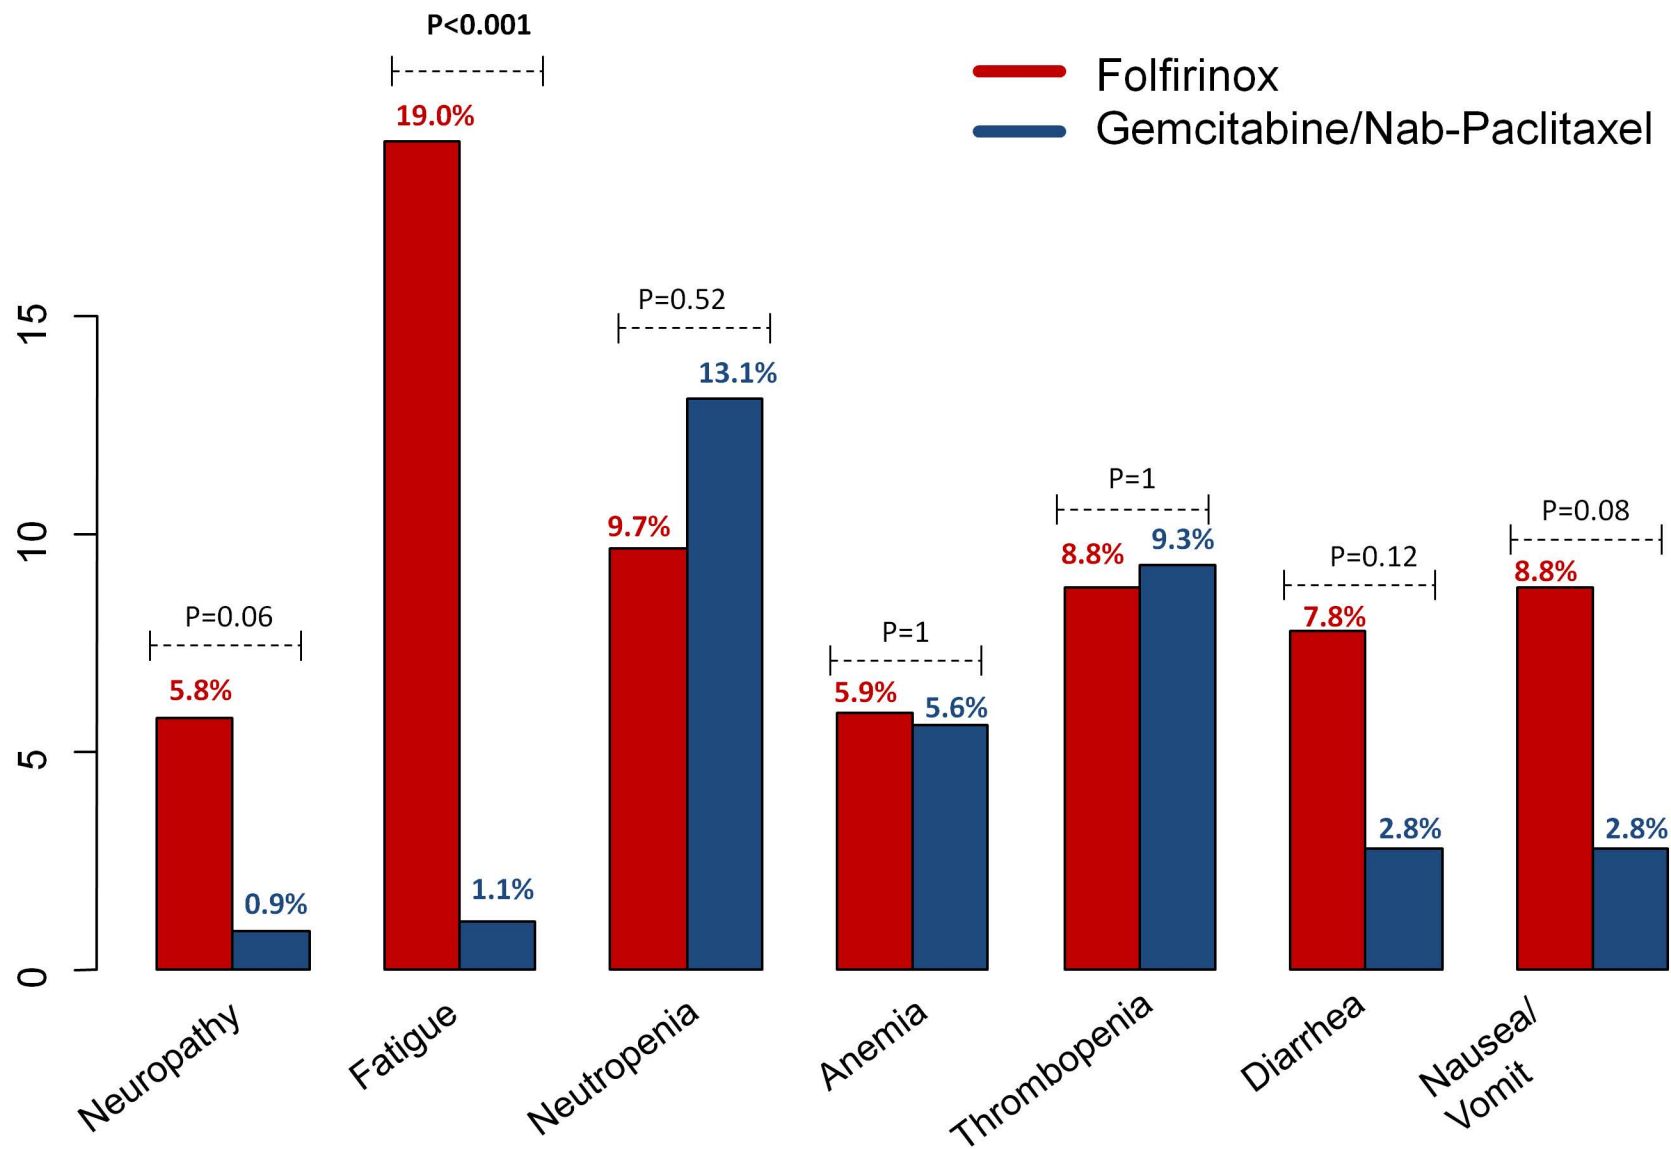

Supplement: SupplFig2Toxicities.pdf [file SupplFig2Toxicities.pdf]
